# Supplementary figures and images for: Mammalian Small Nucleolar RNAs Are Mobile Genetic Elements
Source: PLOS journal article supplement (doi:10.1371/journal.pgen.0020205), 2006-01-01

A

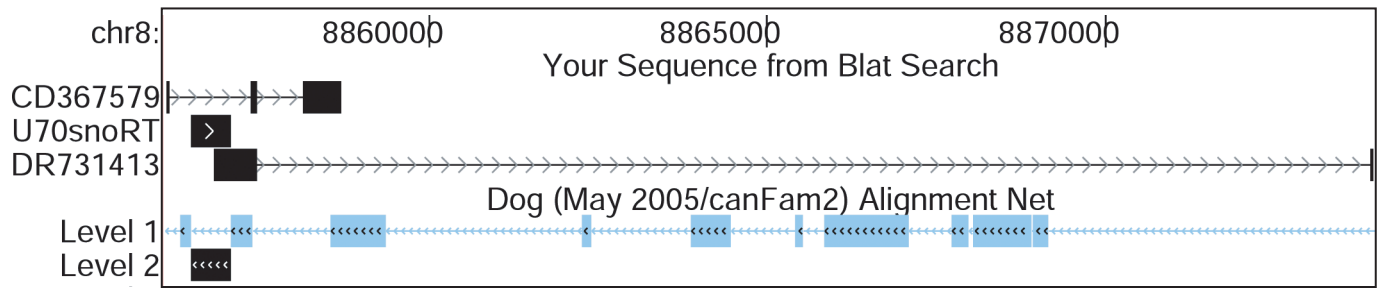

B

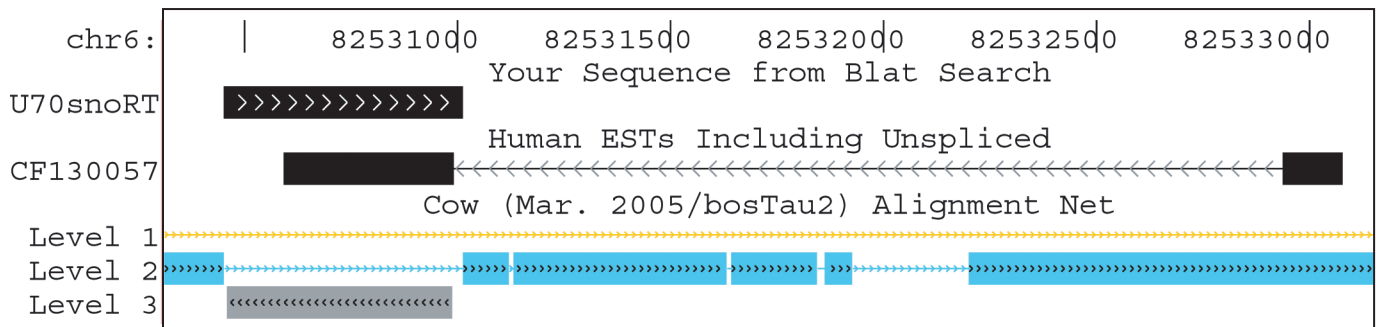

Supplementary Figure S5

Supplement: S5 (10.1371/journal.pgen.0020205.s005) [file journal.pgen.0020205.s005]
